# Supplementary material for: Functional traits of broad-leaved monocot herbs in the understory and forest edges of a Costa Rican rainforest
Source: PeerJ. 2020 Oct 27;8:e9958. doi: 10.7717/peerj.9958 (PMC7597634; doi:10.7717/peerj.9958)
Supplement: Table S1 — See Methods for sampling details and Table 1 for full species names. [file peerj-08-9958-s001.xlsx]

## Sheet: Table 1
Supplemental Table 1. Raw data for leaf area, fresh weight, dry weight, specific leaf area, and water content. See Methods section
for sampling details and Table 1 for full species name.
Species		Area	Fresh weight	Dry weight	SLA	fw/dw	Water content
		(cm2)	(mg)	(mg)	(cm2 mg-1)		(fw-dw)/dw
A. sleeperae		2146.97	58.763	13.035	164.708	4.50809	3.50809
		1355.09	33.041	7.671	176.65	4.30726	3.30726
		1726.37	43.371	10.491	164.557	4.13411	3.13411
	Mean	1742.81	45.0583	10.399	169	4.32	3.31
	SD	323.496	10.5685	2.19081	5.66546	0.152816	0.152816
A. ochranthum		1176.64	27.788	4.665	252.227	5.9567	4.9567
		1014.54	22.539	4.806	211.098	4.68976	3.68976
		1659.91	38.672	7.014	236.656	5.51354	4.51354
	Mean	1283.69	29.6663	5.495	233.327	5.38667	4.38667
	SD	274.13	6.71886	1.07564	16.9549	0.524947	0.524947
A. uncinata		1153.53	32.55	6.871	167.884	4.7373	3.7373
		1062.3	29.603	6.215	170.924	4.76315	3.76315
		1363.67	39.455	8.526	159.943	4.62761	3.62761
	Mean	1193.17	33.8693	7.204	166.25	4.70936	3.70936
	SD	126.189	4.12884	0.972401	4.62949	0.0587583	0.0587583
C. bipartitus		1939.11	50.493	10.107	191.858	4.99584	3.99584
		1738.93	43.742	9.775	177.895	4.47488	3.47488
		1746.01	43.382	8.818	198.005	4.91971	3.91971
	Mean	1808.02	45.8723	9.56667	189.253	4.79681	3.79681
	SD	92.7439	3.27061	0.546463	8.41377	0.22975	0.22975
C. crotalifera		2419.67	45.508	15.844	152.719	2.87225	1.87225
		1663.8	33.075	9.705	171.438	3.40804	2.40804
		2003.46	37.936	11.091	180.639	3.42043	2.42043
	Mean	2028.98	38.8397	12.2133	168.265	3.23357	2.23357
	SD	309.11	5.11581	2.62888	11.617	0.255542	0.255542
C. laevis		439.269	24.733	4.314	101.824	5.73319	4.73319
		448.187	24.121	4.931	90.8917	4.89171	3.89171
		386.143	21.858	4.502	85.7714	4.85518	3.85518
	Mean	424.533	23.5707	4.58233	93	5.16	4.16
	SD	27.3889	1.23654	0.258215	6.69511	0.405566	0.405566
C. lasiostachya		380.917	5.696	1.518	250.933	3.75231	2.75231
		964.225	16.24	4.447	216.826	3.6519	2.6519
		456.227	6.462	1.785	255.589	3.62017	2.62017
	Mean	600.456	9.466	2.58333	241.116	3.67479	2.67479
	SD	259.054	4.80014	1.32231	17.2807	0.056321	0.056321
C. leucostachys		493.89	17.138	1.957	252.371	8.75728	7.75728
		772.4	31.466	2.274	339.666	13.8373	12.8373
		744.072	34.648	3.984	186.765	8.69679	7.69679
	Mean	670.121	27.7507	2.73833	259.601	10.4305	9.43045
	SD	125.149	7.6159	0.890276	62.6304	2.40912	2.40912
C. lutea		2988.62	60.82	17.672	169.116	3.4416	2.4416
		2359.85	46.009	12.991	181.653	3.54161	2.54161
		1957.96	33.181	10.942	178.94	3.03244	2.03244
	Mean	2435.48	46.67	13.8683	176.57	3.33855	2.33855
	SD	424.147	11.2933	2.81668	5.38564	0.220267	0.220267
C. malortieanus		295.592	14.003	1.157	255.481	12.1029	11.1029
		347.745	19.537	1.622	214.393	12.045	11.045
		486.943	27.684	1.93	252.302	14.344	13.344
	Mean	376.76	20.408	1.56967	240	12.83	11.83
	SD	80.768	5.6191	0.317738	18.6652	1.0704	1.0704
C. scaber		146.213	4.346	0.837	174.687	5.19235	4.19235
		191.089	6.312	1.085	176.119	5.81751	4.81751
		191.47	6.147	0.944	202.828	6.51165	5.51165
	Mean	176.257	5.60167	0.955333	184.545	5.84051	4.84051
	SD	21.2451	0.890442	0.101562	12.9417	0.538847	0.538847
C. similis		696.922	9.059	2.1	331.868	4.31381	3.31381
		1661.69	26.799	6.218	267.239	4.30991	3.30991
		1543.45	25.998	6.011	256.771	4.32507	3.32507
	Mean	1300.69	20.6187	4.77633	285.292	4.31626	3.31626
	SD	429.647	8.18046	1.89434	33.2097	0.00642903	0.00642903
C. sulcata		2149.14	45.552	11.806	182.038	3.85838	2.85838
		2328.8	50.982	13.693	170.072	3.72322	2.72322
		2141.89	45.239	10.423	205.496	4.34031	3.34031
	Mean	2206.61	47.2577	11.974	185.869	3.97397	2.97397
	SD	86.453	2.6366	1.34025	14.7133	0.264853	0.264853
D. longispatha		276.27	9.68	1.8	153.483	5.37778	4.37778
		180.58	5.577	1.117	161.665	4.99284	3.99284
		333.481	9.676	2.149	155.18	4.50256	3.50256
	Mean	263.444	8.311	1.68867	157	4.96	4.96
	SD	63.077	1.93323	0.428604	3.52582	0.358168	0.358168
D. tonduzii		693.496	26.784	3.171	218.699	8.44655	7.44655
		720.522	33.227	3.875	185.941	8.57471	7.57471
		756.725	28.464	3.687	205.241	7.7201	6.7201
	Mean	723.581	29.4917	3.57767	203	8.25	7.24
	SD	25.9036	2.72887	0.297623	20.8536	0.376315	0.376315
D. wedelii		189.521	5.052	1.053	179.982	4.79772	3.79772
		243.282	6.476	1.194	203.754	5.42379	4.42379
		207.346	5.644	1.2	172.788	4.70333	3.70333
	Mean	213.383	5.724	1.149	185.508	4.97495	3.97495
	SD	22.3591	0.584091	0.0679264	13.2317	0.319708	0.319708
G. cleistantha		683.476	13.71	2.11	323.922	6.49763	5.49763
		583.652	13.237	2.335	249.958	5.66895	4.66895
		535.913	10.429	1.714	312.668	6.0846	5.0846
	Mean	601.014	12.4587	2.053	295.516	6.08373	5.08373
	SD	61.4805	1.44812	0.256706	32.5404	0.338308	0.338308
G. gymnocarpa		1694.78	44.51	7.25	233.762	6.13931	5.13931
		1629.41	42.118	8.351	195.115	5.04347	4.04347
		1013.37	27.815	4.207	240.876	6.6116	5.6116
	Mean	1445.85	38.1477	6.60267	223.251	5.93146	4.93146
	SD	306.975	7.37127	1.75261	20.1059	0.656841	0.656841
G. inocephala		2157.17	44.443	10.546	204.548	4.2142	3.2142
		3008.49	67.14	15.184	198.136	4.42176	3.42176
		2223.8	49.305	11.3	196.796	4.36327	3.36327
	Mean	2463.15	53.6293	12.3433	199.827	4.33308	3.33308
	SD	386.573	9.7575	2.0321	3.38313	0.0873827	0.0873827
G. marantifolia		1382.78	29.09	4.591	301.193	6.33631	5.33631
		890.02	15.335	3.031	293.639	5.05939	4.05939
		1021.23	15.965	3.017	338.492	5.29168	4.29168
	Mean	1098.01	20.13	3.54633	311.108	5.56246	4.56246
	SD	208.364	6.3409	0.738713	19.6074	0.555352	0.555352
G. micans		17.511	0.233	0.044	397.977	5.29545	4.29545
		17.147	0.224	0.041	418.22	5.46341	4.46341
		14.784	0.198	0.035	422.4	5.65714	4.65714
	Mean	16.4807	0.218333	0.04	412.866	5.472	4.472
	SD	1.20889	0.0148399	0.00374166	10.6651	0.147783	0.147783
G. warscewiczii		172.974	4.542	0.518	333.927	8.76834	7.76834
		407.461	12.026	1.485	274.385	8.09832	7.09832
		259.65	7.409	0.796	326.193	9.30779	8.30779
	Mean	280.028	7.99233	0.933	311.502	8.72482	7.72482
	SD	96.8074	3.08305	0.406488	26.4349	0.494723	0.494723
H. imbricata		5034.1	119.92	27.713	181.651	4.32721	3.32721
		3588.6	85.49	23.25	154.348	3.67699	2.67699
		3185.77	65.05	15.511	205.388	4.1938	3.1938
	Mean	3936.16	90.1533	22.158	180.462	4.066	3.066
	SD	793.589	22.642	5.04094	20.8536	0.280412	0.280412
H. irrasa		712.347	14.054	2.953	241.228	4.75923	3.75923
		770.011	14.119	2.888	266.624	4.88885	3.88885
		602.358	11.143	2.209	272.684	5.04436	4.04436
	Mean	694.905	13.1053	2.68333	260.179	4.89748	3.89748
	SD	69.5463	1.38783	0.336452	13.6264	0.116566	0.116566
H. latispatha		2889.46	65.48	15.756	183.388	4.15588	3.15588
		1949	36.582	7.599	256.481	4.81405	3.81405
		3555.37	76.07	20.034	177.467	3.79705	2.79705
	Mean	2797.95	59.3773	14.463	205.779	4.25566	3.25566
	SD	658.985	16.6885	5.15824	35.9334	0.421145	0.421145
H. mathiasiae		847.601	18.763	4.538	186.779	4.13464	3.13464
		694.96	14.587	3.326	208.948	4.38575	3.38575
		500.852	11.965	2.915	171.819	4.10463	3.10463
	Mean	681.138	15.105	3.593	189.182	4.20834	3.20834
	SD	141.897	2.79934	0.68896	15.2527	0.126044	0.126044
H. pogonantha		4431.48	96.2	25.253	175.483	3.80945	2.80945
		4579.24	104.85	35.335	129.595	2.96731	1.96731
		5414.87	141.25	43.402	124.761	3.25446	2.25446
	Mean	4808.53	114.1	34.6633	143.28	3.34374	2.34374
	SD	432.972	19.52	7.4245	22.8566	0.349549	0.349549
H. sarapiquensis		1660.17	28.55	6.723	246.939	4.24662	3.24662
		1803.93	31.434	6.916	260.834	4.54511	3.54511
		1673.62	28.139	6.516	256.848	4.31845	3.31845
	Mean	1712.57	29.3743	6.71833	254.874	4.37006	3.37006
	SD	64.8288	1.46604	0.163333	5.84173	0.127208	0.127208
H. umbrophila		892.211	18.402	3.739	238.623	4.92164	3.92164
		1034.23	24.384	4.131	250.359	5.90269	4.90269
		952.33	21.193	3.955	240.791	5.35853	4.35853
	Mean	959.592	21.3263	3.94167	243.258	5.39429	4.39429
	SD	58.208	2.44396	0.160311	5.099	0.401309	0.401309
H. wagneriana		2273.98	44.321	23.672	96.0621	1.8723	0.872296
		2369.04	44.781	27.632	85.7354	1.62062	0.620621
		2447.81	51.434	25.249	96.9468	2.03707	1.03707
	Mean	2363.61	46.8453	25.5177	93	1.84333	0.843329
	SD	71.068	3.25011	1.62779	5.0894	0.171244	0.171244
I. inflatus		770.368	12.208	3.135	245.731	3.8941	2.8941
		711.588	11.011	3.137	226.837	3.51004	2.51004
		1066.6	16.139	4.273	249.613	3.77697	2.77697
	Mean	849.517	13.1193	3.515	240.727	3.72704	2.72704
	SD	155.362	2.19043	0.535988	9.94868	0.160717	0.160717
P. grandipes		606.934	14.538	2.216	273.887	6.56047	5.56047
		504.264	12.13	1.86	271.11	6.52151	5.52151
		450.65	10.719	1.638	275.122	6.54396	5.54396
	Mean	520.616	12.4623	1.90467	273.373	6.54198	5.54198
	SD	64.8419	1.57671	0.238072	1.67793	0.0159684	0.0159684
P. leucostachya		1773.19	32.017	8.662	204.709	3.69626	2.69626
		1806.67	31.916	8.262	218.672	3.86299	2.86299
		1663.19	29.741	8.058	206.402	3.69087	2.69087
	Mean	1747.68	31.2247	8.32733	210	3.85	2.75
	SD	61.2896	1.04992	0.250872	6.22177	0.0798977	0.0798977
R. cernua		263.208	5.827	1.36	193.535	4.28456	3.28456
		249.204	7.143	1.743	142.974	4.09811	3.09811
		160.612	3.783	1.012	158.708	3.73814	2.73814
	Mean	224.341	5.58433	1.37167	165	4.04	3.04
	SD	45.4247	1.3824	0.298544	21.1264	0.226792	0.226792
R. pluriplicata		565.813	13.901	3.062	184.785	4.53984	3.53984
		298.952	5.942	1.207	247.682	4.92295	3.92295
		421.902	9.947	2.079	202.935	4.78451	3.78451
	Mean	428.889	9.93	2.116	211.801	4.7491	3.7491
	SD	109.058	3.24927	0.757752	26.4316	0.158394	0.158394
S. friedrichsthallii		529.716	14.221	2.154	245.922	6.60214	5.60214
		299.745	8.6	1.529	196.04	5.62459	4.62459
		282.823	9.096	1.776	159.247	5.12162	4.12162
	Mean	370.761	10.639	1.81967	200.403	5.78278	4.78278
	SD	112.61	2.54094	0.257017	35.5191	0.614681	0.614681
S. fulvovirens		384.848	10.766	2.241	171.73	4.80411	3.80411
		323.582	7.98	1.56	207.424	5.11538	4.11538
		321.298	8.454	1.669	192.509	5.06531	4.06531
	Mean	343.243	9.06667	1.82333	190.555	4.99493	3.99493
	SD	29.4342	1.21709	0.298669	14.6374	0.136475	0.136475
S. laeve		244.288	5.161	1.198	203.913	4.30801	3.30801
		244.307	5.853	1.445	169.071	4.05052	3.05052
		276.323	5.997	1.373	201.255	4.36781	3.36781
	Mean	254.973	5.67033	1.33867	191.413	4.24211	3.24211
	SD	15.097	0.364919	0.103719	15.8356	0.137659	0.137659
S. phryniifolium		344.852	6.881	1.292	266.913	5.32585	4.32585
		389.197	8.202	1.311	296.87	6.25629	5.25629
		189.356	4.375	0.709	267.075	6.17066	5.17066
	Mean	307.802	6.486	1.104	276.953	5.9176	4.9176
	SD	85.688	1.58714	0.279415	14.084	0.419889	0.419889
S. wendlandii		671.281	22.888	3.489	192.399	6.56005	5.56005
		673.824	22.742	3.11	216.664	7.31254	6.31254
		892.484	31.863	5.049	176.765	6.31075	5.31075
	Mean	745.863	25.831	3.88267	195.276	6.72778	5.72778
	SD	103.682	4.26568	0.839111	16.4153	0.425828	0.425828

## Sheet: Table 2
Supplemental Table 2. Raw data for leaf nitrogen, 𝛿13C, 𝛿15N, and C to N ratio.
Species		𝛿13C	𝛿15N	N%	C/N ratio	C amount	N amount
						(µg)	(µg)
A. sleeperae		-36.3846	1.53913	3.87752	13.5419	1102.69	81.4279
		-32.4485	3.60189	3.48382	13.9925	1023.69	73.1603
		-34.5078	2.72057	4.44464	13.7657	1284.85	93.3374
	Mean	-34.447	2.62053	3.93533	13.7667	1137.08	82.6419
	SD	1.96874	1.03502	0.48301	0.225261	133.933	10.1432
A. ochranthum		-37.9647	2.89055	2.8511	21.0621	1261.06	59.8731
		-38.4422	4.1041	2.70741	18.8385	1071.08	56.8557
		-38.3174	2.84925	3.57911	15.7237	1181.81	75.1612
	Mean	-38.2414	3.2813	3.04587	18.5415	1171.32	63.9634
	SD	0.247654	0.712866	0.467348	2.68158	95.4233	9.8143
A. uncinata		-38.7473	2.8663	1.96495	22.7058	936.933	41.264
		-37.4868	2.22932	2.05704	26.6251	1150.15	43.1979
		-38.5773	3.44163	2.9121	22.3084	1364.25	61.1541
	Mean	-38.2705	2.84575	2.31137	23.8798	1150.45	48.5387
	SD	0.68396	0.60642	0.522286	2.38581	213.66	10.968
C. bipartitus		-37.6924	-0.0658759	3.52205	18.0154	1332.48	73.9631
		-35.3693	1.81692	2.95258	20.3383	1261.06	62.0041
		-35.537	3.18803	2.87147	17.8932	1078.98	60.3009
	Mean	-36.1996	1.64636	3.11537	18.749	1224.17	65.4227
	SD	1.29553	1.63364	0.354526	1.37772	130.713	7.44505
C. crotalifera		-30.4941	1.94056	3.54111	18.6664	1388.1	74.3633
		-30.9341	2.28525	3.3488	16.4674	1158.06	70.3248
		-30.509	2.24885	2.16795	19.5416	889.671	45.5271
	Mean	-30.6457	2.15822	3.01929	18.2251	1145.28	63.405
	SD	0.249818	0.189376	0.743519	1.5839	249.459	15.6139
C. lasiostachya		-36.1376	3.63861	3.48382	15.8291	1158.06	73.1603
		-37.0345	2.2875	3.09301	14.5461	944.814	64.9533
		-37.7703	2.42056	3.4069	14.0878	1007.91	71.5449
	Mean	-36.9808	2.78222	3.32791	14.821	1036.93	69.8861
	SD	0.817685	0.744632	0.207031	0.902661	109.547	4.34766
C. leucostachys		-33.4183	1.82295	2.66601	15.4691	866.056	55.9863
		-34.421	2.55521	2.18094	18.2226	834.588	45.7997
	Mean	-33.9196	2.18908	2.42347	16.8458	850.322	50.893
	SD	0.708981	0.517787	0.343	1.947	22.2519	7.20301
C. lutea		-29.0948	2.59948	3.3682	19.2876	1364.25	70.7323
		-29.3609	2.65298	2.47779	19.8254	1031.59	52.0336
		-30.0664	1.70066	2.9121	16.4814	1007.91	61.1541
	Mean	-29.5074	2.31771	2.91937	18.5315	1134.58	61.3067
	SD	0.50208	0.535048	0.445251	1.79564	199.253	9.35027
C. malortieanus		-35.2548	2.91979	2.04612	22.3555	960.58	42.9685
		-34.532	2.19215	2.99289	16.6645	1047.38	62.8508
		-34.6639	2.91914	2.13544	18.2601	818.86	44.8442
	Mean	-34.8169	2.67703	2.39148	19.0934	94.1863	8.96326
	SD	0.384933	0.419914	0.522748	2.93554	115.354	10.9777
C. scaber		-34.5624	1.49871	2.30357	25.0852	1213.5	48.375
		-34.6901	0.928355	2.17877	24.1003	1102.69	45.7543
		-35.2185	1.73339	2.87147	22.2288	1340.42	60.3009
	Mean	-34.8237	1.38682	2.45127	23.8048	1218.87	51.4767
	SD	0.347885	0.414018	0.369215	1.45092	118.955	7.75352
C. similis		-36.7348	1.75841	2.81024	14.1419	834.588	59.0151
		-36.2175	2.61823	3.46465	16.6786	1213.5	72.7576
		-36.2623	2.33128	3.30987	16.3195	1134.33	69.5073
	Mean	-36.4049	2.23597	3.19492	15.7134	1060.8	67.0933
	SD	0.286615	0.43776	0.342013	1.37268	199.868	7.18226
C. sulcata		-38.0728	5.34802	3.56013	18.3541	1372.2	74.7627
		-36.6858	2.86821	3.52205	18.2302	1348.36	73.9631
		-38.1988	5.01197	3.11292	17.5941	1150.15	65.3713
	Mean	-37.6525	4.4094	3.39837	18.0595	1290.24	71.3657
	SD	0.839542	1.34524	0.247935	0.407744	121.903	5.20663
D. longispatha		-33.8664	1.16658	3.76677	11.9442	944.814	79.1023
		-34.2404	2.79151	3.65464	15.3987	1181.81	76.7474
		-35.0386	2.27727	3.52205	15.4433	1142.24	73.9631
	Mean	-34.3818	2.07845	3.64782	14.2621	1089.62	76.6043
	SD	0.598763	0.83051	0.122504	2.00748	126.959	2.57258
D. tonduzii		-33.0043	1.01617	3.76677	13.2408	1047.38	79.1023
		-31.3546	-0.698542	3.59805	12.0872	913.296	75.559
		-33.6202	0.0511033	4.28914	12.4179	1118.51	90.0719
	Mean	-32.6597	0.122909	3.88465	12.582	1026.39	81.5777
	SD	1.17146	0.859607	0.360311	0.594057	104.202	7.56653
D. wedelii		-31.9545	-0.91717	2.97275	18.4237	1150.15	62.4278
		-34.01	1.97474	3.61695	17.5428	1332.48	75.9559
		-30.5798	0.35834	2.51989	21.4357	1134.33	52.9177
	Mean	-32.1814	0.471969	3.03653	19.134	1205.65	63.7671
	SD	1.72631	1.4493	0.551304	2.04136	110.12	11.5774
G. cleistantha		-34.6465	2.54397	3.46465	14.7212	1071.08	72.7576
		-36.9395	4.69019	3.76677	13.5404	1071.08	79.1023
		-36.2038	2.60877	3.54111	15.4666	1150.15	74.3633
	Mean	-35.9299	3.28098	3.59084	14.5761	1097.44	75.4077
	SD	1.17075	1.22084	0.157084	0.971277	45.6527	3.29876
G. gymnocarpa		-33.2708	2.75775	3.63581	15.8934	1213.5	76.3521
		-34.7935	0.979216	3.61695	15.0382	1142.24	75.9559
		-34.4337	2.37279	2.76923	16.3824	952.696	58.1538
	Mean	-34.166	2.03658	3.34066	15.7713	1102.81	70.1539
	SD	0.795868	0.935718	0.494968	0.68037	134.796	10.3943
G. inocephala		-34.2404	3.91391	2.76923	18.9617	1102.69	58.1538
		-33.4393	4.51691	2.51989	17.11	905.42	52.9177
		-34.8591	4.10683	2.81024	18.417	1086.88	59.0151
	Mean	-34.1796	4.17922	2.69979	18.1629	1031.66	56.6955
	SD	0.71185	0.307947	0.157139	0.951647	109.617	3.29992
G. marantifolia		-32.2154	5.18126	3.69217	13.6102	1055.28	77.5356
		-33.4567	4.23579	3.07307	13.1762	850.32	64.5344
		-33.5827	5.65744	3.01299	12.9417	818.86	63.2729
	Mean	-33.085	5.02483	3.25941	13.2427	908.153	68.4476
	SD	0.755677	0.723617	0.375983	0.33918	128.381	7.89565
G. micans		-37.0763	3.40455	2.76923	17.3318	1007.91	58.1538
		-37.2716	2.9708	3.03306	14.4624	921.174	63.6942
		-37.6184	2.34793	3.42619	14.3376	1031.59	71.9499
	Mean	-37.3221	2.90776	3.07616	15.3773	986.889	64.5993
	SD	0.274552	0.531123	0.330594	1.6938	58.1297	6.94247
G. warscewiczii		-36.6827	-1.84844	2.97275	13.6208	850.32	62.4278
		-36.888	0.160126	3.71088	12.5288	976.351	77.9285
		-37.3606	-2.27607	2.93236	13.6807	842.453	61.5795
	Mean	-36.9771	-1.32146	3.20533	13.2768	889.708	67.3119
	SD	0.34758	1.30079	0.438285	0.648471	75.138	9.20398
H. imbricata		-33.1683	2.29505	2.45668	18.7722	968.465	51.5904
		-30.9927	0.914215	3.87752	15	1221.42	81.4279
		-32.6146	1.21927	2.66601	18.4257	1031.59	55.9863
	Mean	-32.2585	1.47618	3.00007	17.3993	1073.82	63.0015
	SD	1.13066	0.725381	0.767066	2.08506	131.661	16.1084
H. irrasa		-34.8433	1.98265	2.43554	19.5521	1000.02	51.1463
		-33.0948	1.38262	2.97275	20.8356	1300.72	62.4278
		-36.0248	1.72343	2.45668	20.6081	1063.18	51.5904
	Mean	-34.6543	1.69624	2.62166	20.3319	1121.31	55.0548
	SD	1.47416	0.300935	0.304241	0.684888	158.557	6.38906
H. latispatha		-32.9235	3.78874	4.81156	11.7745	1189.73	101.043
		-31.9654	3.74181	2.93236	13.4253	826.723	61.5795
		-29.0019	3.92927	4.71335	10.9808	1086.88	98.9803
	Mean	-31.2969	3.81994	4.15242	12.0602	1034.45	87.2008
	SD	2.04449	0.0975479	1.05775	1.24704	187.099	22.2127
H. mathiasiae		-34.3591	3.54368	3.80384	15.1913	1213.5	79.8807
		-33.3988	2.98732	3.91412	16.9842	1396.05	82.1966
		-34.7742	3.46376	2.37187	18.3359	913.296	49.8093
	Mean	-34.1773	3.33159	3.36328	16.8372	1174.28	70.6289
	SD	0.705512	0.30081	0.860355	1.57741	243.753	18.0675
H. pogonantha		-28.7154	5.44099	2.97275	19.4384	1213.5	62.4278
		-28.8689	1.96792	3.13279	16.5208	1086.88	65.7886
		-27.7012	1.73489	3.56013	17.5042	1308.66	74.7627
	Mean	-28.4285	3.04793	3.22189	17.8211	1203.01	67.6597
	SD	0.634539	2.07572	0.303654	1.48437	111.26	6.37674
H. sarapiquensis		-36.4895	5.40505	3.80384	16.5814	1324.54	79.8807
		-36.0564	4.36689	3.3682	18.3894	1300.72	70.7323
		-33.8087	2.79274	2.93236	15.599	960.58	61.5795
	Mean	-35.4515	4.18822	3.36814	16.8566	1195.28	70.7308
	SD	1.43912	1.31529	0.435743	1.41539	203.605	9.15061
H. umbrophila		-32.4422	4.60276	4.14829	12.5673	1094.79	87.1141
		-34.1222	2.91539	3.91412	15.149	1245.2	82.1966
		-35.6734	2.6175	3.56013	13.9038	1039.48	74.7627
	Mean	-34.0793	3.37855	3.87418	13.8734	1126.49	81.3578
	SD	1.61601	1.07061	0.296108	1.29114	106.459	6.21828
H. wagneriana		-28.0365	10.2851	3.17241	13.3543	889.671	66.6207
		-29.0187	8.38294	2.49886	17.8545	936.933	52.476
		-28.5605	12.0148	4.00496	15.0883	1268.99	84.1042
	Mean	-28.5386	10.2276	3.22541	15.4323	1031.86	67.7336
	SD	0.491461	1.81662	0.754448	2.26975	206.71	15.8434
I. inflatus		-35.0883	1.56958	2.23918	19.7575	929.053	47.0229
		-35.7932	3.09917	3.25119	20.0981	1372.2	68.2751
		-36.5102	1.72106	2.21764	21.4732	1000.02	46.5705
	Mean	-35.7972	2.12993	2.56934	20.4429	1100.42	53.9561
	SD	0.710975	0.84279	0.5906	0.90833	238.025	12.4026
P. grandipes		-34.8729	3.94029	3.42619	12.584	905.42	71.9499
		-36.6516	2.17964	4.37592	13.4641	1237.27	91.8942
		-36.5732	2.87139	3.52205	11.8157	873.927	73.9631
	Mean	-36.0326	2.99711	3.77472	12.6213	1005.54	79.2691
	SD	1.00511	0.887033	0.522854	0.82481	201.302	10.9799
P. leucostachya		-33.2791	5.03304	3.15262	16.0589	1063.18	66.205
		-32.2367	5.56769	3.61695	16.7069	1268.99	75.9559
		-32.9552	5.11977	2.99289	18.5516	1165.98	62.8508
	Mean	-32.8237	5.24017	3.25415	17.1058	1166.05	68.3372
	SD	0.533505	0.286943	0.324181	1.29334	102.905	6.8078
R. cernua		-37.0583	3.5216	2.83069	21.7478	1292.79	59.4445
		-32.911	3.34589	3.19217	19.8772	1332.48	67.0355
		-36.241	7.03846	2.62446	20.2946	1118.51	55.1136
	Mean	-35.4034	4.63532	2.88244	20.6399	1247.92	60.5312
	SD	2.19683	2.08304	0.28737	0.981933	113.822	6.03478
R. pluriplicata		-35.5631	0.816643	2.24349	26.5982	1253.13	47.1132
		-37.4725	1.18556	1.84777	24.7553	960.58	38.8031
		-36.6787	1.93621	2.27571	27.7158	1324.54	47.79
	Mean	-36.5714	1.31281	2.12232	26.3564	1179.41	44.5688
	SD	0.959226	0.570527	0.238319	1.49501	192.851	5.00469
S. friedrichsthallii		-35.261	2.78041	4.41035	11.2234	1039.48	92.6175
		-35.9807	8.14831	4.27167	12.3806	1110.6	89.7051
		-36.2633	8.11765	4.63044	12.1537	1181.81	97.2392
	Mean	-35.835	6.34879	4.43749	11.9192	1110.63	93.1872
	SD	0.516811	3.09034	0.180918	0.613176	71.1655	3.79927
S. fulvovirens		-37.7886	2.86049	4.77898	12.3285	1237.27	100.359
		-36.9578	3.13726	4.90838	11.1583	1150.15	103.076
		-37.2267	2.8744	4.25416	10.9288	976.351	89.3373
	Mean	-37.3244	2.95738	4.64717	11.4719	1121.26	97.5906
	SD	0.423939	0.155935	0.346454	0.750695	132.838	7.27553
S. laeve		-37.5808	3.80615	5.17514	12.7726	1388.1	108.678
		-37.2194	3.10489	3.3682	13.2462	936.933	70.7323
		-36.5418	3.39714	4.44464	13.7657	1284.85	93.3374
	Mean	-37.114	3.43606	4.32933	13.2615	1203.29	90.9159
	SD	0.527456	0.352246	0.908971	0.496729	236.381	19.0884
S. phryniifolium		-37.4626	3.79037	3.57911	14.7762	1110.6	75.1612
		-38.8137	3.88298	3.72955	12.4661	976.351	78.3206
		-38.3655	4.67955	4.92438	12.3479	1276.92	103.412
		-39.7332	4.11162	4.34132	12.4422	1134.33	91.1677
	Mean	-38.5937	4.11613	4.14359	13.0081	1129.2	90.9668
	SD	0.69727	0.410151	0.597472	0.0624968	150.35	12.5469
S. wendlandii		-38.5304	2.27843	4.35864	12.9116	1181.81	91.5314
		-39.0579	3.60259	3.72955	15.1905	1189.73	78.3206
		-37.7849	3.97867	3.27079	15.2487	1047.38	68.6866
	Mean	-38.4577	3.28656	3.78633	14.4503	1139.64	79.5129
	SD	0.639574	0.89309	0.546141	1.33287	79.9995	11.469

## Sheet: Table 3 v1
Supplemental Table 3. Raw data. CO2 Assimilation (umol m-2 s-1) for
understory and forest edge broad-leaved monocot herbs at the La Selva
Biological Station, Costa Rica. Comparative data on understory palms are added.
Replicated measurements of light response curves for photosynthetic
assimilation were made for selected understory and forest edge species to
determine maximum rates under light-saturating conditions. Gas exchange
measurements were carried out using a LI-COR 6400 gas exchange instruments
(Li-Cor, Lincoln, Neb., USA). Photosynthetic assimilation and and stomatal
conductance were measured in mid-morning and early afternoon over several
days.
Forest Layer	Species		Pmax
			(µmol m-2 s-1)
Understory	A. martiana		3.19
			3.13
			3.06
			3.06
			3.07
			3.04
		Mean	3.09167
		SD	0.052095
	A. uncinata		2.08
			2.25
			2.14
			2.08
			2.3
			2.18
		Mean	2.17167
		SD	0.0821415
	C. scaber		2.21
			1.05
			1.55
		Mean	1.60333
		SD	0.475067
	D. longispatha		2.07
			2.28
			1.75
		Mean	2.03333
		SD	0.217919
	H. irrasa		3.14
			3.21
			3.15
			3.22
		Mean	3.18
		SD	0.0353553
	H. umbrophila		3.09
			3.25
			3.33
			2.6
			2.45
			3.02
			2.83
		Mean	2.93857
		SD	0.303524
	P. grandipes		1.83
			1.94
			2.02
			2.45
		Mean	2.06
		SD	0.235053
	R. pluriplicata		1.34
			1.46
			1.38
			1.44
			1.25
			1.34
		Mean	1.36833
		SD	0.069861
	S. fulvovirens		2.9
			2.72
			2.8
			2.81
		Mean	2.8075
		SD	0.0637868
	S. phryniifolium		3.03
			2.92
			2.58
			2.64
			2.89
		Mean	2.812
		SD	0.172441
	S. wendlandii		3.33
			3.24
			2.2
			2.78
		Mean	2.8875
		SD	0.448407
Edge and Large Gaps	C. lasiostachya		4.42
			3.94
			4.02
			4.39
			4.81
			4.51
		Mean	4.34833
		SD	0.294585
	C. lutea		8.25
			8.45
			7.85
			7.86
		Mean	8.1025
		SD	0.257427
	C. similis		7.7
			7.86
			5.92
			5.93
		Mean	6.8525
		SD	0.92923
	H. latispatha		13.95
			14.36
			13.71
			14.64
			12.97
			14.51
		Mean	14.0233
		SD	0.569142
	H. mathiasiae		8.44
			7.65
			7.94
			8.77
			8.19
			8.31
		Mean	8.21667
		SD	0.356636
	S. friedrichsthallii		6.79
			6.95
			7.61
			6.81
			7.59
			6.91
		Mean	7.11
		SD	0.350809

## Sheet: Table 3 v2
Supplemental Table 3. Raw data. CO2 Assimilation(µmol m-2 s-1) for understory and forest edge broad-leaved monocot herbs at the La Selva Biological Station, Costa Rica. Comparative data on understory palms are added. Replicated measurements of light response curves for photosynthetic assimilation were made for selected understory and
forest edge species to determine maximum rates under light-saturating conditions. Gas exchange measurements were carried out using a LI-COR 6400 gas exchange instruments (Li-Cor, Lincoln, Neb., USA). Photosynthetic assimilation and stomatal conductance were measured in mid-morning and early afternoon over several days.
	Understory												Edge and Large Gaps
Species	A. martiana	A. uncinata	C. scaber	D. longispatha	H. irrasa	H. umbrophila	P. grandipes	R. pluriplicata	S. fulvovirens	S. phryniifolium	S. wendlandii		C. lasiostachya	C. lutea	C. similis	H. latispatha	H. mathiasiae	S. friedrichsthallii
Pmax	3.19	2.08	2.21	2.07	3.14	3.09	1.83	1.34	2.9	3.03	3.33		4.42	8.25	7.7	13.95	8.44	6.79
(µmol m-2 s-1)	3.13	2.25	1.05	2.28	3.21	3.25	1.94	1.46	2.72	2.92	3.24		3.94	8.45	7.86	14.36	7.65	6.95
	3.06	2.14	1.55	1.75	3.15	3.33	2.02	1.38	2.8	2.58	2.2		4.02	7.85	5.92	13.71	7.94	7.61
	3.06	2.08			3.22	2.6	2.45	1.44	2.81	2.64	2.78		4.39	7.86	5.93	14.64	8.77	6.81
	3.07	2.3				2.45		1.25		2.89			4.81			12.97	8.19	7.59
	3.04	2.18				3.02		1.34					4.51			14.51	8.31	6.91
						2.83
Mean	3.09167	2.17167	1.60333	2.03333	3.18	2.93857	2.06	1.36833	2.8075	2.812	2.8875		4.34833	8.1025	6.8525	14.0233	8.21667	7.11
SD	0.052095	0.0821415	0.475067	0.217919	0.0353553	0.303524	0.235053	0.069861	0.0637868	0.172441	0.448407		0.294585	0.257427	0.92923	0.569142	0.356636	0.350809

## Sheet: Table 3 v3
Supplemental Table 3. Raw data. CO2 Assimilation (µmol m-2 s-1) for understory and forest edge broad-leaved monocot herbs at the La Selva Biological Station, Costa Rica. Comparative data on understory palms are added. Replicated measurements of light response curves for photosynthetic assimilation were made for selected understory and
forest edge species to determine maximum rates under light-saturating conditions. Gas exchange measurements were carried out using a LI-COR 6400 gas exchange instruments (Li-Cor, Lincoln, Neb., USA). Photosynthetic assimilation and stomatal conductance were measured in mid-morning and early afternoon over several days.
	Understory																	Edge and Large Gaps
	Araceae						Arecacea		Costaceae		Cyclanthaceae		Heliconiaceae			Zingiberaceae		Araceae		Heliconiaceae			Marantaceae
Species	D. longispatha	P. grandipes	S. fulvovirens	S. phryniifolium	S. wendlandii		A. martiana		C. scaber		A. uncinata		H. irrasa	H. umbrophila		R. pluriplicata		S. friedrichsthallii		H. latispatha	H. mathiasiae		C. lasiostachya	C. lutea	C. similis
Pmax	2.07	1.83	2.9	3.03	3.33		3.19		2.21		2.08		3.14	3.09		1.34		6.79		13.95	8.44		4.42	8.25	7.7
(µmol m-2 s-1)	2.28	1.94	2.72	2.92	3.24		3.13		1.05		2.25		3.21	3.25		1.46		6.95		14.36	7.65		3.94	8.45	7.86
	1.75	2.02	2.8	2.58	2.2		3.06		1.55		2.14		3.15	3.33		1.38		7.61		13.71	7.94		4.02	7.85	5.92
		2.45	2.81	2.64	2.78		3.06				2.08		3.22	2.6		1.44		6.81		14.64	8.77		4.39	7.86	5.93
				2.89			3.07				2.3			2.45		1.25		7.59		12.97	8.19		4.81
							3.04				2.18			3.02		1.34		6.91		14.51	8.31		4.51
														2.83
Mean	2.03333	2.06	2.8075	2.812	2.8875		3.09167		1.60333		2.17167		3.18	2.93857		1.36833		7.11		14.0233	8.21667		4.34833	8.1025	6.8525
SD	0.217919	0.235053	0.0637868	0.172441	0.448407		0.052095		0.475067		0.0821415		0.0353553	0.303524		0.069861		0.350809		0.569142	0.356636		0.294585	0.257427	0.92923
