# Supplementary material for: Functional traits of broad-leaved monocot herbs in the understory and forest edges of a Costa Rican rainforest
Source: PeerJ. 2020 Oct 27;8:e9958. doi: 10.7717/peerj.9958 (PMC7597634; doi:10.7717/peerj.9958)
Supplement: Table S2 — Leaf N, d13C, d15N, and C to N ratio. [file peerj-08-9958-s002.xlsx]

## Sheet: Sheet1
Supplemental Table 2. Raw data for leaf nitrogen, 𝛿13C, 𝛿15N, and C to N ratio.
Species		𝛿13C	𝛿15N	N%	C/N ratio	C amount	N amount
						(µg)	(µg)
A. sleeperae		-36.3846	1.53913	3.87752	13.5419	1102.69	81.4279
		-32.4485	3.60189	3.48382	13.9925	1023.69	73.1603
		-34.5078	2.72057	4.44464	13.7657	1284.85	93.3374
	Mean	-34.447	2.62053	3.93533	13.7667	1137.08	82.6419
	SD	1.96874	1.03502	0.48301	0.225261	133.933	10.1432
A. ochranthum		-37.9647	2.89055	2.8511	21.0621	1261.06	59.8731
		-38.4422	4.1041	2.70741	18.8385	1071.08	56.8557
		-38.3174	2.84925	3.57911	15.7237	1181.81	75.1612
	Mean	-38.2414	3.2813	3.04587	18.5415	1171.32	63.9634
	SD	0.247654	0.712866	0.467348	2.68158	95.4233	9.8143
A. uncinata		-38.7473	2.8663	1.96495	22.7058	936.933	41.264
		-37.4868	2.22932	2.05704	26.6251	1150.15	43.1979
		-38.5773	3.44163	2.9121	22.3084	1364.25	61.1541
	Mean	-38.2705	2.84575	2.31137	23.8798	1150.45	48.5387
	SD	0.68396	0.60642	0.522286	2.38581	213.66	10.968
C. bipartitus		-37.6924	-0.0658759	3.52205	18.0154	1332.48	73.9631
		-35.3693	1.81692	2.95258	20.3383	1261.06	62.0041
		-35.537	3.18803	2.87147	17.8932	1078.98	60.3009
	Mean	-36.1996	1.64636	3.11537	18.749	1224.17	65.4227
	SD	1.29553	1.63364	0.354526	1.37772	130.713	7.44505
C. crotalifera		-30.4941	1.94056	3.54111	18.6664	1388.1	74.3633
		-30.9341	2.28525	3.3488	16.4674	1158.06	70.3248
		-30.509	2.24885	2.16795	19.5416	889.671	45.5271
	Mean	-30.6457	2.15822	3.01929	18.2251	1145.28	63.405
	SD	0.249818	0.189376	0.743519	1.5839	249.459	15.6139
C. lasiostachya		-36.1376	3.63861	3.48382	15.8291	1158.06	73.1603
		-37.0345	2.2875	3.09301	14.5461	944.814	64.9533
		-37.7703	2.42056	3.4069	14.0878	1007.91	71.5449
	Mean	-36.9808	2.78222	3.32791	14.821	1036.93	69.8861
	SD	0.817685	0.744632	0.207031	0.902661	109.547	4.34766
C. leucostachys		-33.4183	1.82295	2.66601	15.4691	866.056	55.9863
		-34.421	2.55521	2.18094	18.2226	834.588	45.7997
	Mean	-33.9196	2.18908	2.42347	16.8458	850.322	50.893
	SD	0.708981	0.517787	0.343	1.947	22.2519	7.20301
C. lutea		-29.0948	2.59948	3.3682	19.2876	1364.25	70.7323
		-29.3609	2.65298	2.47779	19.8254	1031.59	52.0336
		-30.0664	1.70066	2.9121	16.4814	1007.91	61.1541
	Mean	-29.5074	2.31771	2.91937	18.5315	1134.58	61.3067
	SD	0.50208	0.535048	0.445251	1.79564	199.253	9.35027
C. malortieanus		-35.2548	2.91979	2.04612	22.3555	960.58	42.9685
		-34.532	2.19215	2.99289	16.6645	1047.38	62.8508
		-34.6639	2.91914	2.13544	18.2601	818.86	44.8442
	Mean	-34.8169	2.67703	2.39148	19.0934	94.1863	8.96326
	SD	0.384933	0.419914	0.522748	2.93554	115.354	10.9777
C. scaber		-34.5624	1.49871	2.30357	25.0852	1213.5	48.375
		-34.6901	0.928355	2.17877	24.1003	1102.69	45.7543
		-35.2185	1.73339	2.87147	22.2288	1340.42	60.3009
	Mean	-34.8237	1.38682	2.45127	23.8048	1218.87	51.4767
	SD	0.347885	0.414018	0.369215	1.45092	118.955	7.75352
C. similis		-36.7348	1.75841	2.81024	14.1419	834.588	59.0151
		-36.2175	2.61823	3.46465	16.6786	1213.5	72.7576
		-36.2623	2.33128	3.30987	16.3195	1134.33	69.5073
	Mean	-36.4049	2.23597	3.19492	15.7134	1060.8	67.0933
	SD	0.286615	0.43776	0.342013	1.37268	199.868	7.18226
C. sulcata		-38.0728	5.34802	3.56013	18.3541	1372.2	74.7627
		-36.6858	2.86821	3.52205	18.2302	1348.36	73.9631
		-38.1988	5.01197	3.11292	17.5941	1150.15	65.3713
	Mean	-37.6525	4.4094	3.39837	18.0595	1290.24	71.3657
	SD	0.839542	1.34524	0.247935	0.407744	121.903	5.20663
D. longispatha		-33.8664	1.16658	3.76677	11.9442	944.814	79.1023
		-34.2404	2.79151	3.65464	15.3987	1181.81	76.7474
		-35.0386	2.27727	3.52205	15.4433	1142.24	73.9631
	Mean	-34.3818	2.07845	3.64782	14.2621	1089.62	76.6043
	SD	0.598763	0.83051	0.122504	2.00748	126.959	2.57258
D. tonduzii		-33.0043	1.01617	3.76677	13.2408	1047.38	79.1023
		-31.3546	-0.698542	3.59805	12.0872	913.296	75.559
		-33.6202	0.0511033	4.28914	12.4179	1118.51	90.0719
	Mean	-32.6597	0.122909	3.88465	12.582	1026.39	81.5777
	SD	1.17146	0.859607	0.360311	0.594057	104.202	7.56653
D. wedelii		-31.9545	-0.91717	2.97275	18.4237	1150.15	62.4278
		-34.01	1.97474	3.61695	17.5428	1332.48	75.9559
		-30.5798	0.35834	2.51989	21.4357	1134.33	52.9177
	Mean	-32.1814	0.471969	3.03653	19.134	1205.65	63.7671
	SD	1.72631	1.4493	0.551304	2.04136	110.12	11.5774
G. cleistantha		-34.6465	2.54397	3.46465	14.7212	1071.08	72.7576
		-36.9395	4.69019	3.76677	13.5404	1071.08	79.1023
		-36.2038	2.60877	3.54111	15.4666	1150.15	74.3633
	Mean	-35.9299	3.28098	3.59084	14.5761	1097.44	75.4077
	SD	1.17075	1.22084	0.157084	0.971277	45.6527	3.29876
G. gymnocarpa		-33.2708	2.75775	3.63581	15.8934	1213.5	76.3521
		-34.7935	0.979216	3.61695	15.0382	1142.24	75.9559
		-34.4337	2.37279	2.76923	16.3824	952.696	58.1538
	Mean	-34.166	2.03658	3.34066	15.7713	1102.81	70.1539
	SD	0.795868	0.935718	0.494968	0.68037	134.796	10.3943
G. inocephala		-34.2404	3.91391	2.76923	18.9617	1102.69	58.1538
		-33.4393	4.51691	2.51989	17.11	905.42	52.9177
		-34.8591	4.10683	2.81024	18.417	1086.88	59.0151
	Mean	-34.1796	4.17922	2.69979	18.1629	1031.66	56.6955
	SD	0.71185	0.307947	0.157139	0.951647	109.617	3.29992
G. marantifolia		-32.2154	5.18126	3.69217	13.6102	1055.28	77.5356
		-33.4567	4.23579	3.07307	13.1762	850.32	64.5344
		-33.5827	5.65744	3.01299	12.9417	818.86	63.2729
	Mean	-33.085	5.02483	3.25941	13.2427	908.153	68.4476
	SD	0.755677	0.723617	0.375983	0.33918	128.381	7.89565
G. micans		-37.0763	3.40455	2.76923	17.3318	1007.91	58.1538
		-37.2716	2.9708	3.03306	14.4624	921.174	63.6942
		-37.6184	2.34793	3.42619	14.3376	1031.59	71.9499
	Mean	-37.3221	2.90776	3.07616	15.3773	986.889	64.5993
	SD	0.274552	0.531123	0.330594	1.6938	58.1297	6.94247
G. warscewiczii		-36.6827	-1.84844	2.97275	13.6208	850.32	62.4278
		-36.888	0.160126	3.71088	12.5288	976.351	77.9285
		-37.3606	-2.27607	2.93236	13.6807	842.453	61.5795
	Mean	-36.9771	-1.32146	3.20533	13.2768	889.708	67.3119
	SD	0.34758	1.30079	0.438285	0.648471	75.138	9.20398
H. imbricata		-33.1683	2.29505	2.45668	18.7722	968.465	51.5904
		-30.9927	0.914215	3.87752	15	1221.42	81.4279
		-32.6146	1.21927	2.66601	18.4257	1031.59	55.9863
	Mean	-32.2585	1.47618	3.00007	17.3993	1073.82	63.0015
	SD	1.13066	0.725381	0.767066	2.08506	131.661	16.1084
H. irrasa		-34.8433	1.98265	2.43554	19.5521	1000.02	51.1463
		-33.0948	1.38262	2.97275	20.8356	1300.72	62.4278
		-36.0248	1.72343	2.45668	20.6081	1063.18	51.5904
	Mean	-34.6543	1.69624	2.62166	20.3319	1121.31	55.0548
	SD	1.47416	0.300935	0.304241	0.684888	158.557	6.38906
H. latispatha		-32.9235	3.78874	4.81156	11.7745	1189.73	101.043
		-31.9654	3.74181	2.93236	13.4253	826.723	61.5795
		-29.0019	3.92927	4.71335	10.9808	1086.88	98.9803
	Mean	-31.2969	3.81994	4.15242	12.0602	1034.45	87.2008
	SD	2.04449	0.0975479	1.05775	1.24704	187.099	22.2127
H. mathiasiae		-34.3591	3.54368	3.80384	15.1913	1213.5	79.8807
		-33.3988	2.98732	3.91412	16.9842	1396.05	82.1966
		-34.7742	3.46376	2.37187	18.3359	913.296	49.8093
	Mean	-34.1773	3.33159	3.36328	16.8372	1174.28	70.6289
	SD	0.705512	0.30081	0.860355	1.57741	243.753	18.0675
H. pogonantha		-28.7154	5.44099	2.97275	19.4384	1213.5	62.4278
		-28.8689	1.96792	3.13279	16.5208	1086.88	65.7886
		-27.7012	1.73489	3.56013	17.5042	1308.66	74.7627
	Mean	-28.4285	3.04793	3.22189	17.8211	1203.01	67.6597
	SD	0.634539	2.07572	0.303654	1.48437	111.26	6.37674
H. sarapiquensis		-36.4895	5.40505	3.80384	16.5814	1324.54	79.8807
		-36.0564	4.36689	3.3682	18.3894	1300.72	70.7323
		-33.8087	2.79274	2.93236	15.599	960.58	61.5795
	Mean	-35.4515	4.18822	3.36814	16.8566	1195.28	70.7308
	SD	1.43912	1.31529	0.435743	1.41539	203.605	9.15061
H. umbrophila		-32.4422	4.60276	4.14829	12.5673	1094.79	87.1141
		-34.1222	2.91539	3.91412	15.149	1245.2	82.1966
		-35.6734	2.6175	3.56013	13.9038	1039.48	74.7627
	Mean	-34.0793	3.37855	3.87418	13.8734	1126.49	81.3578
	SD	1.61601	1.07061	0.296108	1.29114	106.459	6.21828
H. wagneriana		-28.0365	10.2851	3.17241	13.3543	889.671	66.6207
		-29.0187	8.38294	2.49886	17.8545	936.933	52.476
		-28.5605	12.0148	4.00496	15.0883	1268.99	84.1042
	Mean	-28.5386	10.2276	3.22541	15.4323	1031.86	67.7336
	SD	0.491461	1.81662	0.754448	2.26975	206.71	15.8434
I. inflatus		-35.0883	1.56958	2.23918	19.7575	929.053	47.0229
		-35.7932	3.09917	3.25119	20.0981	1372.2	68.2751
		-36.5102	1.72106	2.21764	21.4732	1000.02	46.5705
	Mean	-35.7972	2.12993	2.56934	20.4429	1100.42	53.9561
	SD	0.710975	0.84279	0.5906	0.90833	238.025	12.4026
P. grandipes		-34.8729	3.94029	3.42619	12.584	905.42	71.9499
		-36.6516	2.17964	4.37592	13.4641	1237.27	91.8942
		-36.5732	2.87139	3.52205	11.8157	873.927	73.9631
	Mean	-36.0326	2.99711	3.77472	12.6213	1005.54	79.2691
	SD	1.00511	0.887033	0.522854	0.82481	201.302	10.9799
P. leucostachya		-33.2791	5.03304	3.15262	16.0589	1063.18	66.205
		-32.2367	5.56769	3.61695	16.7069	1268.99	75.9559
		-32.9552	5.11977	2.99289	18.5516	1165.98	62.8508
	Mean	-32.8237	5.24017	3.25415	17.1058	1166.05	68.3372
	SD	0.533505	0.286943	0.324181	1.29334	102.905	6.8078
R. cernua		-37.0583	3.5216	2.83069	21.7478	1292.79	59.4445
		-32.911	3.34589	3.19217	19.8772	1332.48	67.0355
		-36.241	7.03846	2.62446	20.2946	1118.51	55.1136
	Mean	-35.4034	4.63532	2.88244	20.6399	1247.92	60.5312
	SD	2.19683	2.08304	0.28737	0.981933	113.822	6.03478
R. pluriplicata		-35.5631	0.816643	2.24349	26.5982	1253.13	47.1132
		-37.4725	1.18556	1.84777	24.7553	960.58	38.8031
		-36.6787	1.93621	2.27571	27.7158	1324.54	47.79
	Mean	-36.5714	1.31281	2.12232	26.3564	1179.41	44.5688
	SD	0.959226	0.570527	0.238319	1.49501	192.851	5.00469
S. friedrichsthallii		-35.261	2.78041	4.41035	11.2234	1039.48	92.6175
		-35.9807	8.14831	4.27167	12.3806	1110.6	89.7051
		-36.2633	8.11765	4.63044	12.1537	1181.81	97.2392
	Mean	-35.835	6.34879	4.43749	11.9192	1110.63	93.1872
	SD	0.516811	3.09034	0.180918	0.613176	71.1655	3.79927
S. fulvovirens		-37.7886	2.86049	4.77898	12.3285	1237.27	100.359
		-36.9578	3.13726	4.90838	11.1583	1150.15	103.076
		-37.2267	2.8744	4.25416	10.9288	976.351	89.3373
	Mean	-37.3244	2.95738	4.64717	11.4719	1121.26	97.5906
	SD	0.423939	0.155935	0.346454	0.750695	132.838	7.27553
S. laeve		-37.5808	3.80615	5.17514	12.7726	1388.1	108.678
		-37.2194	3.10489	3.3682	13.2462	936.933	70.7323
		-36.5418	3.39714	4.44464	13.7657	1284.85	93.3374
	Mean	-37.114	3.43606	4.32933	13.2615	1203.29	90.9159
	SD	0.527456	0.352246	0.908971	0.496729	236.381	19.0884
S. phryniifolium		-37.4626	3.79037	3.57911	14.7762	1110.6	75.1612
		-38.8137	3.88298	3.72955	12.4661	976.351	78.3206
		-38.3655	4.67955	4.92438	12.3479	1276.92	103.412
		-39.7332	4.11162	4.34132	12.4422	1134.33	91.1677
	Mean	-38.5937	4.11613	4.14359	13.0081	1129.2	90.9668
	SD	0.69727	0.410151	0.597472	0.0624968	150.35	12.5469
S. wendlandii		-38.5304	2.27843	4.35864	12.9116	1181.81	91.5314
		-39.0579	3.60259	3.72955	15.1905	1189.73	78.3206
		-37.7849	3.97867	3.27079	15.2487	1047.38	68.6866
	Mean	-38.4577	3.28656	3.78633	14.4503	1139.64	79.5129
	SD	0.639574	0.89309	0.546141	1.33287	79.9995	11.469
