# Supplementary material for: Functional traits of broad-leaved monocot herbs in the understory and forest edges of a Costa Rican rainforest
Source: PeerJ. 2020 Oct 27;8:e9958. doi: 10.7717/peerj.9958 (PMC7597634; doi:10.7717/peerj.9958)
Supplement: Table S3 — CO2 Assimilation (umol m-2 s-1) for understory and forest edge broad-leaved monocot herbs at the La Selva Biological Station, Costa Rica. Comparative data on understory palms are added. Replicated measurements of light response curves for photosynthetic assimilation were made for selected understory and forest edge species to determine maximum rates under light-saturating conditions. Gas exchange measurements were carried out using a LI-COR 6400 gas exchange instruments (Li-Cor, Lincoln, Neb., USA). Photosynthetic assimilation and stomatal conductance were measured in mid-morning and early afternoon over several days. [file peerj-08-9958-s003.xlsx]

## Sheet: Sheet1
Supplemental Table 3. Raw data. CO2 Assimilation (umol m-2 s-1) for
understory and forest edge broad-leaved monocot herbs at the La Selva
Biological Station, Costa Rica. Comparative data on understory palms are added.
Replicated measurements of light response curves for photosynthetic
assimilation were made for selected understory and forest edge species to
determine maximum rates under light-saturating conditions. Gas exchange
measurements were carried out using a LI-COR 6400 gas exchange instruments
(Li-Cor, Lincoln, Neb., USA). Photosynthetic assimilation and and stomatal
conductance were measured in mid-morning and early afternoon over several
days.
Forest Layer	Species		Pmax
			(µmol m-2 s-1)
Understory	A. martiana		3.19
			3.13
			3.06
			3.06
			3.07
			3.04
		Mean	3.09167
		SD	0.052095
	A. uncinata		2.08
			2.25
			2.14
			2.08
			2.3
			2.18
		Mean	2.17167
		SD	0.0821415
	C. scaber		2.21
			1.05
			1.55
		Mean	1.60333
		SD	0.475067
	D. longispatha		2.07
			2.28
			1.75
		Mean	2.03333
		SD	0.217919
	H. irrasa		3.14
			3.21
			3.15
			3.22
		Mean	3.18
		SD	0.0353553
	H. umbrophila		3.09
			3.25
			3.33
			2.6
			2.45
			3.02
			2.83
		Mean	2.93857
		SD	0.303524
	P. grandipes		1.83
			1.94
			2.02
			2.45
		Mean	2.06
		SD	0.235053
	R. pluriplicata		1.34
			1.46
			1.38
			1.44
			1.25
			1.34
		Mean	1.36833
		SD	0.069861
	S. fulvovirens		2.9
			2.72
			2.8
			2.81
		Mean	2.8075
		SD	0.0637868
	S. phryniifolium		3.03
			2.92
			2.58
			2.64
			2.89
		Mean	2.812
		SD	0.172441
	S. wendlandii		3.33
			3.24
			2.2
			2.78
		Mean	2.8875
		SD	0.448407
Edge and Large Gaps	C. lasiostachya		4.42
			3.94
			4.02
			4.39
			4.81
			4.51
		Mean	4.34833
		SD	0.294585
	C. lutea		8.25
			8.45
			7.85
			7.86
		Mean	8.1025
		SD	0.257427
	C. similis		7.7
			7.86
			5.92
			5.93
		Mean	6.8525
		SD	0.92923
	H. latispatha		13.95
			14.36
			13.71
			14.64
			12.97
			14.51
		Mean	14.0233
		SD	0.569142
	H. mathiasiae		8.44
			7.65
			7.94
			8.77
			8.19
			8.31
		Mean	8.21667
		SD	0.356636
	S. friedrichsthallii		6.79
			6.95
			7.61
			6.81
			7.59
			6.91
		Mean	7.11
		SD	0.350809
